# Supplementary material for: HPLC profiling of selected phenolic acids and flavonoids in Salvia eigii, Salvia hierosolymitana and Salvia viridis growing wild in Jordan and their in vitro antioxidant activity
Source: PeerJ. 2020 Aug 26;8:e9769. doi: 10.7717/peerj.9769 (PMC7456256; doi:10.7717/peerj.9769)
Supplement: Supplemental Information 1 [file peerj-08-9769-s001.xls]

## Sheet: Ascorbic acid
DPPH
DPPH
conc		Conc (mg/ml)	% I1	%I2	I3
0.005	-2.30103	0.005	52.5606	53.432	51.5021
0.01	-2	0.01	66.442	67.2948	67.525
0.05	-1.30103	0.05	90.7008	92.0592	91.1302
0.1	-1	0.1	94.8787	96.3661	96.5665
0.5	-0.30103	0.5	96.9003	97.1736	97.1388
1	0	1	98.7871	97.5774	97.568
		IC50	-2.88317	-2.97997	-2.90861
			0.00130868	0.0010472	0.0012342
				Average IC50	0.00119669
				STDEV	0.000134715
ABTS
	Log con	%I1	%I2	%I3
0.005	-2.30103	9.86301	10	11.4958
0.01	-2	16.3014	16.3889	18.4211
0.05	-1.30103	82.4658	84.1667	82.687
0.1	-1	98.3562	97.7778	97.9224
0.5	-0.30103	98.9041	99.1667	99.0305
1	0	99.863	99.5833	99.5845
	IC50	-1.56435	-1.5713	-1.58765
		0.0272678	0.0268347	0.0258435
			Average IC50	0.0266487
			STDEV	0.000730153
FIC
		I1	I2	I3
0.005	-2.30103	13.6667	11.5254	14.5161
0.01	-2	31.3333	28.1356	32.9032
0.05	-1.30103	36	36.6102	36.7742
0.1	-1	40.6667	41.3559	44.8387
0.5	-0.30103	44.3333	48.1356	47.0968
1	0	54.3333	54.9153	55.1613
	IC50	-0.212337	-0.342059	-0.361557
		0.613285	0.454927	0.434954
			Average IC50	0.501055
			STDEV	0.0977058

## Sheet: tocopherrol
DPPH ( α-tocopherol)
C(mg/ml)	A1	A2	A3	A
blank	0.744	0.742	0.736	0.740667
0.005	0.701	0.708	0.714	0.707667
0.01	0.656	0.642	0.632	0.643333
0.05	0.232	0.245	0.229	0.235333
0.1	0.084	0.091	0.083	0.086
0.5	0.049	0.051	0.048	0.0493333
1	0.009	0.024	0.021	0.018
IC50
	-1.40933	-1.39483	-1.40262
	0.0389648	0.0402878	0.0395713
			Average IC50	0.039608
			STDEV	0.000662263
ABTS ( α-tocopherol)
C(mg/ml)	A1	A2	A3	A
blank	0.596	0.661	0.616	0.624333
0.005	0.537	0.601	0.549	0.562333
0.01	0.487	0.524	0.502	0.504333
0.05	0.326	0.366	0.354	0.348667
0.1	0.097	0.104	0.085	0.0953333
0.5	0.008	0.005	0.004	0.00566667
1	0.001	0.002	0.001	0.00133333
C(mg/ml)	I1%	I2%	I3%	I%
-2.30103	19.8925	10.9164	16.3043	15.7066	4.51799
-2	27.8226	19.0027	25.4076	24.0774	4.55788
-1.30103	34.543	29.3801	31.7935	31.9082	2.5833
-1	56.1828	50.6739	51.9022	52.9253	2.89197
-0.30103	86.9624	85.9838	88.4511	87.1287	1.24239
0	98.9247	99.3261	99.4565	99.2349	0.277168
IC50	-1.36687	-1.3857	-1.37281
	0.0429669	0.0411438	0.0423825
			Average IC50	0.0421644
			STDEV	0.000930888

## Sheet: EDTA
ferrous chelating effect
ferrous chelating effect of EDTA
C(mg/ml)	A1	A2	A3	A
blank	0.268	0.295	0.254	0.272333
0.005	0.135	0.139	0.124	0.132667
0.01	0.078	0.091	0.084	0.0843333
0.05	0.008	0.014	0.014	0.012
0.1	0.003	0.004	0.005	0.004
0.5	0.002	0.003	0.002	0.00233333
1	0.0001	0.001	0.001	0.0007
C(mg/ml)	I1%	I2%	I3%	I%
-2.30103	49.6269	52.8814	51.1811	51.2852	1.62921
-2	70.8955	69.1525	66.9291	69.033	1.98866
-1.30103	97.0149	95.2542	94.4882	95.5936	1.29562
-1	98.8806	98.6441	98.0315	98.5312	0.438476
-0.30103	99.2537	98.9831	99.2126	99.1432	0.146084
0	99.9627	99.661	99.6063	99.743	0.191925
	IC50
		-2.95702	-3.00732	-2.87593
		0.00110402	0.000983287	0.00133068
					Average IC50	0.00113933
					STDEV	0.000176367

## Sheet: S eigii
DPPH
sample #	concentration	Absorbance(517)			avearage	%scavenge
		trial 1	trial 2	trial 3
blank	0	0.848	0.856	0.853	0.852333	0
1	0.005	0.841	0.844	0.846	0.843667	1.01682
2	0.01	0.824	0.829	0.829	0.827333	2.93312
3	0.05	0.682	0.68	0.677	0.679667	20.2581
4	0.1	0.501	0.521	0.52	0.514	39.695
5	0.5	0.089	0.087	0.093	0.0896667	89.4799
	concentration	I% 1	I% 2	I% 3	I%
1	0.005	0.825472	1.40187	0.820633	1.01599
2	0.01	2.83019	3.15421	2.8136	2.93266
3	0.05	19.5755	20.5607	20.6331	20.2564
4	0.1	40.9198	39.1355	39.0387	39.698
5	0.5	89.5047	89.8364	89.0973	89.4795
				Average IC50	STD
IC50	0.247991	0.246706	0.249267	0.247988	0.00128063
ABTS
sample #	concentration	Absorbance(734)			avearage
		trial 1	trial 2	trial 3
blank	0	0.684	0.677	0.678	0.679667
1	0.005	0.648	0.661	0.654	0.654333
2	0.01	0.638	0.636	0.637	0.637
3	0.05	0.488	0.326	0.486	0.433333
4	0.1	0.331	0.292	0.315	0.312667
5	0.5	0.009	0.01	0.009	0.00933333
sample #	concentration	I% 1	I% 2	I% 3	I%
1	0.005	5.26316	2.36337	3.53982	3.72212
2	0.01	6.72515	6.05613	6.0472	6.27616
3	0.05	28.655	51.8464	28.3186	36.2733
4	0.1	51.6082	56.8685	53.5398	54.0055
5	0.5	98.6842	98.5229	98.6726	98.6266
							Average IC50	STD
			IC50	0.20147	0.147328	0.200507	0.183102	0.0309848
FIC
sample	concentration	trial 1	trial 2	trial 3	Average
blank	0	0.402	0.385	0.393	0.393333
1	0.1	0.361	0.311	0.344	0.338667
2	0.3	0.265031	0.259967	0.238771	0.25459
3	0.5	0.157	0.187	0.14	0.161333
Conc	I%1	I%2	I%3	Average
0.1	10.199	19.2208	12.4682	13.9627
0.3	34.072	32.476	39.244	35.264
0.5	60.9453	51.4286	64.3766	58.9168
				Average IC50	STD
IC50	0.417653	0.494057	0.387108	0.432939	0.055089

## Sheet: S hierosolymitana
DPPH
sample #	concentration	Absorbance(517)			avearage
		trial 1	trial 2	trial 3
blank	0	0.58	0.647	0.595	0.607333
1	0.005	0.565	0.619	0.603	0.595667
2	0.01	0.54	0.595	0.584	0.573
3	0.05	0.335	0.407	0.403	0.381667
4	0.1	0.149	0.213	0.18	0.180667
5	0.5	0.039	0.037	0.037	0.0376667
sample #	concentration	I% 1	I% 2	I% 3	I%
1	0.005	2.58621	4.32767	-1.34454	1.85645
2	0.01	6.89655	8.03709	1.84874	5.59413
3	0.05	42.2414	37.0943	32.2689	37.2015
4	0.1	74.3103	67.0788	69.7479	70.379
5	0.5	93.2759	94.2813	93.7815	93.7796
					Average IC50	STD
	IC50	0.17254	0.182183	0.196797	0.18384	0.0122131
ABTS
Absorbance(734)			avearage
trial 1	trial 2	trial 3
0.595	0.601	0.59	0.595333
0.581	0.581	0.547	0.569667
0.562	0.549	0.541	0.550667
0.381	0.374	0.364	0.373
0.219	0.198	0.176	0.197667
0.007	0.007	0.007	0.007
I% 1	I% 2	I% 3	I%
2.35294	3.32779	7.28814	4.32295
5.54622	8.65225	8.30508	7.50118
35.9664	37.7704	38.3051	37.3473
63.1933	67.0549	70.1695	66.8059
98.8235	98.8353	98.8136	98.8241
			Average	STD
0.188776	0.173771	0.16584	0.176129	0.0116479
FIC
sample	Conc	trial 1	trial 2	trial 3	Average
blank	0	0.323	0.403	0.436	0.387333
1	0.1	0.27	0.322	0.355	0.315667
2	0.3	0.189	0.213	0.258	0.22
3	0.5	0.109	0.12	0.137	0.122
Sample	concentration	I%1	I%2	I%3
	0.1	16.4087	20.0993	18.578
	0.3	41.4861	47.1464	40.8257
	0.5	66.2539	70.2233	68.578
					Average IC50	STD
		0.36916	0.333334	0.358715	0.353736	0.0184245

## Sheet: S viridis
DPPH
sample #	concentration	Absorbance(517)			avearage
		trial 1	trial 2	trial 3
blank	0	0.516	0.612	0.63	0.586
1	0.005	0.514	0.608	0.621	0.581
2	0.01	0.502	0.603	0.595	0.566667
3	0.05	0.396	0.492	0.474	0.454
4	0.1	0.265	0.359	0.343	0.322333
5	0.5	0.03	0.036	0.035	0.0336667
sample #	concentration	I% 1	I% 2	I% 3	I%
1	0.005	0.387597	0.653595	1.42857	0.823254
2	0.01	2.71318	1.47059	5.55556	3.24644
3	0.05	23.2558	19.6078	24.7619	22.5419
4	0.1	48.6434	41.3399	45.5556	45.1796
5	0.5	94.186	94.1176	94.4444	94.2494
					Average IC50	std
	IC50	0.227906	0.235799	0.23697	0.233558	0.00493009
ABTS
sample #	concentration	Absorbance(734)			avearage
		trial 1	trial 2	trial 3
blank	0	0.585	0.595	0.595	0.591667
1	0.005	0.564	0.555	0.575	0.564667
2	0.01	0.437	0.419	0.416	0.424
3	0.05	0.379	0.33	0.343	0.350667
4	0.1	0.311	0.307	0.291	0.303
5	0.5	0.022	0.009	0.008	0.013
sample #	concentration	I% 1	I% 2	I% 3	I%
1	0.005	3.58974	6.72269	3.36134	4.55793
2	0.01	25.2991	29.5798	30.084	28.321
3	0.05	35.2137	44.5378	42.3529	40.7015
4	0.1	46.8376	48.4034	51.0924	48.7778
5	0.5	96.2393	98.4874	98.6555	97.7941
					Average IC50	std
	IC50	0.209135	0.199821	0.201233	0.203396	0.00501959
FIC
sample	concentration	trial 1	trial 2	trial 3	average
blank	0	0.322	0.36	0.32	0.334
1	0.1	0.268	0.34	0.251	0.286333
2	0.3	0.204	0.254	0.218	0.225333
3	0.5	0.12	0.18	0.164	0.154667
sample	concentration	I%1	I%2	I%3
1	0.1	16.7702	5.55556	21.5625
2	0.3	36.646	29.4444	31.875
3	0.5	62.7329	50	48.75
					Average	STD
	IC59	0.398187	0.495005	0.534479	0.47589	0.0701276
