# Supplementary material for: HPLC profiling of selected phenolic acids and flavonoids in Salvia eigii, Salvia hierosolymitana and Salvia viridis growing wild in Jordan and their in vitro antioxidant activity
Source: PeerJ. 2020 Aug 26;8:e9769. doi: 10.7717/peerj.9769 (PMC7456256; doi:10.7717/peerj.9769)
Supplement: Supplemental Information 2 [file peerj-08-9769-s002.xlsx]

## Sheet: TPC
TPC
		S. eigii
		Sample	trial1	trial2	trial3
		standard	0.5	0.5	0.5
		S. eigii	0.493	0.469	0.598
		concentration	26.404	25.1919	31.7071
		mg/g dry extract	23.7636	22.6727	28.5364
		Average				24.9909
		STD				3.11853
		S. hierosolymitana
		Sample	trial1	trial2	trial3
		standard	0.5	0.5	0.5
		S.hierosolymitana	0.483	0.484	0.514
		concentration	25.899	25.9495	27.4646
		mg/g dry extract	26.7537	26.8058	28.371
		Average				27.3102
		STD				0.919072
		S. viridis
		Sample	trial1	trial2	trial3
		standard	0.5	0.5	0.5
		S.viridis	0.535	0.551	0.553
		concentration	28.5253	29.3333	29.4343
		mg/g dry extract	18.1421	18.656	18.7202
		Average				18.5061
		STD				0.3169

## Sheet: TFC
		S. eigii
		Sample	trial1	trial2	trial3
		standard	0.5	0.5	0.5
		S. eigii	0.135	0.132	0.136
		concentration	580.667	570.667	584
		mg/g dry extract	522.6	513.6	525.6
		Average				520.6
		STD				6.245
		S.hierosolymitana
		Sample	trial1	trial2	trial3
		standard	0.5	0.5	0.5
		S.hierosolymitana	0.185	0.186	0.183
		concentration	747.333	750.667	740.667
		mg/g dry extract	771.995	775.439	765.109
		Average				770.848
		STD				5.25978
		S. viridis
		Sample	trial1	trial2	trial3
		standard	0.5	0.5	0.5
		S.viridis	0.106	0.107	0.11
		concentration	484	487.333	497.333
		mg/g dry extract	307.824	309.944	316.304
		Average				311.357
		STD				4.41313
